# Supplementary material for: A Comparison between Solution-Based Synthesis Methods of ZrO2 Nanomaterials for Energy Storage Applications
Source: MDPI journal article supplement (doi:10.3390/en15176452), 2022-09-03
Supplement: s1 [file s1]

Archive with 1 entries (1 files):
- energies-1859939-supplementary.pdf
