# Supplementary material for: A Comparison between Solution-Based Synthesis Methods of ZrO2 Nanomaterials for Energy Storage Applications
Source: MDPI journal article supplement (doi:10.3390/en15176452), 2022-09-03
Supplement: s1 [file s1 › energies-1859939-supplementary.pdf]

# A comparison between solution-based synthesis methods of ZrO<sub>2</sub> nanomaterials for energy storage applications

M. L. Matias<sup>1</sup>, E. Carlos<sup>1\*</sup>, R. Branquinho<sup>1</sup>, H. Valle<sup>1</sup>, J. Marcelino<sup>1</sup>, M. Morais<sup>1</sup>, A. Pimentel<sup>1</sup>, J. Rodrigues<sup>2</sup>, T. Monteiro<sup>2</sup>, E. Fortunato<sup>1</sup>, R. Martins<sup>1\*</sup>, D. Nunes<sup>1\*</sup>

<sup>1</sup>*CENIMAT/i3N, Department of Materials Science, School of Science and Technology, NOVA University Lisbon and CEMOP/UNINOVA, 2829-516 Caparica, Portugal*

<sup>2</sup>*Physics Department & I3N, Aveiro University, Campus Universitário de Santiago, 3810-193 Aveiro, Portugal*

## Supplementary information

Figure S1 shows the high-resolution TEM image of the ZrO<sub>2</sub> nanoparticles calcinated at 800 °C for 15 min. The measured lattice spacings of 0.30 and 0.36 nm are in good agreement with the *d*-spacing of the (101) and (100) planes of the tetragonal ZrO<sub>2</sub> phase, respectively. The FFT image attested for the presence of tetragonal ZrO<sub>2</sub> nanocrystals.

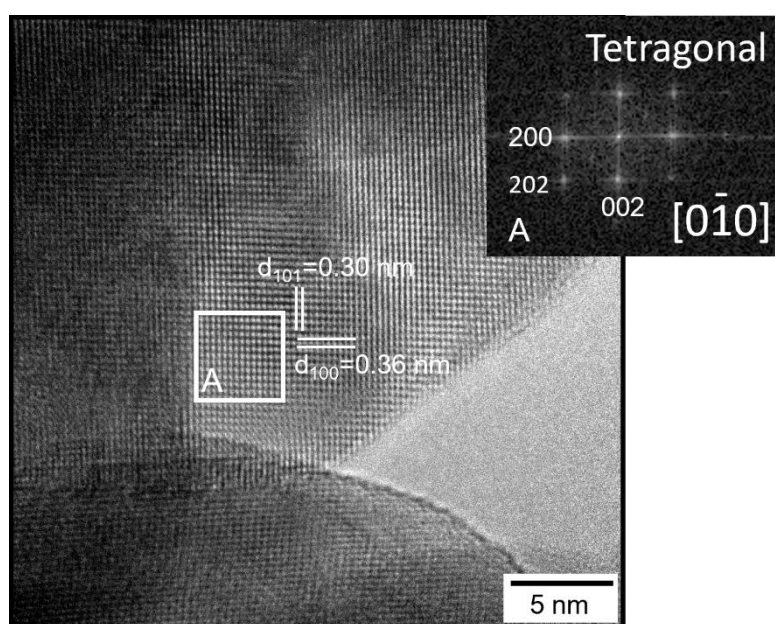

**Figure S1** – High-resolution TEM image of the ZrO<sub>2</sub> nanocrystals calcinated at 800 °C for 15 min. The inset shows the FFT images of the area (black square) indicated as A.

Figure S2 shows the SEM image of a ZrO<sub>2</sub> particle produced by the solution combustion synthesis and annealed at 350 °C. The voids observed can be assigned to the escape of gaseous combustion products that were formed at the time of combustion.

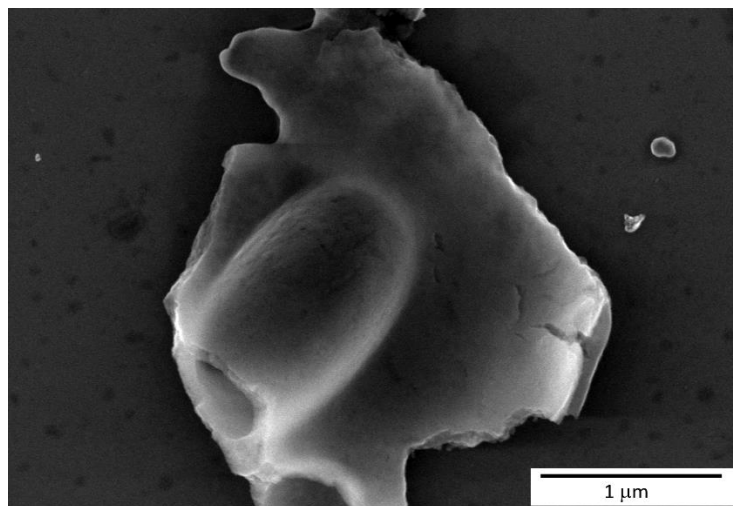

**Figure S2.** SEM image of a ZrO<sub>2</sub> particle produced by solution combustion synthesis and annealed at 350 °C.
